# Supplementary material
Source: MDPI journal article supplement (https://www.mdpi.com/2311-5637/8/4/173)
Supplement: s1 [file s1 › fermentation-1606516-supplementary.pdf]

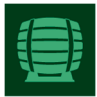

## Supplementary material—File S1

The detailed proofs of Theorem 1, Theorem 2 and Theorem 3 are presented at what follows.

**Theorem 1 [Convergence of the weighted sum of the observer errors].** Consider the model (1), (2) subject to assumptions 1 to 3 and the observer (5)–(7), with definitions (8)–(10) and observer error  $\bar{x}_2 = \hat{x}_2 - x_2$ . As a result of this observer:

Ti) the function  $z = \bar{x}_2 - \sigma\omega\bar{x}_1$ ,  $\sigma = \text{sign}(b)$ , satisfies

$$\frac{dz}{dt} = (-1)\omega|b|(z + \delta), \text{ where } \delta = \frac{1}{b}\left(\frac{\delta_2}{\sigma\omega} - \delta_1\right);$$

Tii) the function  $z$  converges to  $\Omega_z = [z^l, z^u]$ , where  $z^l = -\delta_{\max} \leq 0$ ,  $z^u = -\delta_{\min} \geq 0$ , and  $\delta_{\min}$ ,  $\delta_{\max}$  are unknown constants that satisfy  $\delta \geq \delta_{\min}$ ,  $\delta_{\min} \in (-\infty, 0]$ ,  $\delta \leq \delta_{\max}$ ,  $\delta_{\max} \in [0, \infty)$ ;

Tiii) the upper bound of the transient response of  $z$  is

$$|z| \leq |\psi_{z|t_0}|e^{-\omega b_{\min}(t-t_0)} + \max\{-\delta_{\min}, \delta_{\max}\}.$$

**Proof.** Consider the general observer form :

$$\frac{d\hat{x}_1}{dt} = b\hat{x}_2 - bg_1 + h_1 \quad (S1)$$

$$\frac{d\hat{x}_2}{dt} = -bg_2 + h_2 \quad (S2)$$

where  $g_1$  and  $g_2$  are functions that will be defined later, whereas  $h_1$ ,  $h_2$ ,  $b$  are terms of model (1), (2). Subtracting the  $x_1$  dynamics (1) from expression (S1) and subtracting the  $x_2$  dynamics (2) from expression (S2), yields

$$\frac{d\bar{x}_1}{dt} = b\bar{x}_2 - bg_1 - \delta_1 \quad (S3)$$

$$\frac{d\bar{x}_2}{dt} = -bg_2 - \delta_2 \quad (S4)$$

where  $\bar{x}_1 = \hat{x}_1 - x_1$ ,  $\bar{x}_2 = \hat{x}_2 - x_2$ . Thus, the dynamics of the observation errors  $\bar{x}_1$  and  $\bar{x}_2$  are given by Eqs (S3), (S4), which can be arranged as:

$$\frac{d\bar{x}_2}{dt} = -bg_2 - \delta_2 \quad (S5)$$

$$\sigma\omega\frac{d\bar{x}_1}{dt} = \sigma\omega b\bar{x}_2 - \sigma\omega bg_1 - \sigma\omega\delta_1 \quad (S6)$$

where  $\sigma = \text{sign}(b)$ . Adding and arranging Eqs. (S5), (S6), yields

$$\frac{d}{dt}(\bar{x}_2 - \sigma\omega\bar{x}_1) = (-1)\omega\sigma b\left(\bar{x}_2 + \frac{1}{\sigma\omega}g_2 - g_1 + \frac{1}{b}\left(\frac{\delta_2}{\sigma\omega} - \delta_1\right)\right)$$

which can be rewritten as

$$\frac{dz}{dt} = (-1)\omega|b|\left(z + \sigma\omega\bar{x}_1 + \frac{1}{\sigma\omega}g_2 - g_1 + \delta\right) \quad (S7)$$

where

$$z = \bar{x}_2 - \sigma\omega\bar{x}_1 \quad (S8)$$

$$\delta = \frac{1}{b}\left(\frac{\delta_2}{\sigma\omega} - \delta_1\right) \quad (S9)$$

To counteract the effect of the term  $\sigma\omega\bar{x}_1 + \frac{1}{\sigma\omega}g_2$  appearing in Eq (S7), the function  $g_1$  is defined as

$$g_1 = \sigma\omega\bar{x}_1 + \frac{1}{\sigma\omega}g_2 \quad (S10)$$

So, it remains to define the function  $g_2$ . Substituting into Eq (S7), yields

$$\frac{dz}{dt} = (-1)\omega|b|(z + \delta) \quad (S11)$$

This completes the proof of Ti.

The term  $z + \delta$  appearing in Eq (S11) satisfies:

$$z + \delta \geq z + \delta_{\min} \geq 0 \text{ for } z \geq -\delta_{\min} \geq 0 \quad (S12a)$$

$$z + \delta \leq z + \delta_{\max} \leq 0 \text{ for } z \leq -\delta_{\max} \leq 0 \quad (S12b)$$

And also

$$z + \delta \geq z + \delta_{\min} > 0 \text{ for } z > -\delta_{\min} \geq 0 \quad (S13a)$$

$$z + \delta \leq z + \delta_{\max} < 0 \text{ for } z < -\delta_{\max} \leq 0 \quad (S13b)$$

where  $\delta_{\min}$ ,  $\delta_{\max}$  are unknown constants that satisfy

$$\delta \geq \delta_{\min}, \delta_{\min} \in (-\infty, 0], \delta \leq \delta_{\max}, \delta_{\max} \in [0, \infty)$$

Therefore,

$$\begin{aligned} z + \delta &> 0 \text{ for } z > z^u, \quad z^u = -\delta_{\min} \geq 0 \\ z + \delta &< 0 \text{ for } z < z^l, \quad z^l = -\delta_{\max} \leq 0 \end{aligned}$$

To prove the convergence of  $z$ , we consider the Lyapunov function

$$V_z = \frac{1}{2} \psi_z^2 \quad (S14)$$

$$\psi_z = \begin{cases} z + \delta_{\min} & \text{for } z \geq -\delta_{\min} \geq 0 \\ 0 & \text{for } z \in (-\delta_{\max}, -\delta_{\min}) \\ z + \delta_{\max} & \text{for } z \leq -\delta_{\max} \leq 0 \end{cases} \quad (S15)$$

The main properties of  $\psi_z$  are:

$$\begin{aligned} \psi_z &\geq 0 \text{ for } z \geq -\delta_{\min} \geq 0 \\ \psi_z &\leq 0 \text{ for } z \leq -\delta_{\max} \leq 0 \\ \psi_z &= 0 \text{ for } z \in [-\delta_{\max}, -\delta_{\min}] \end{aligned} \quad (S16)$$

Therefore, the main properties of  $V_z$  (S14) are:

$$\begin{aligned} V_z &= 0 \text{ for } z \in [z^l, z^u] \\ V_z &> 0 \text{ for } z \notin [z^l, z^u] \end{aligned}$$

$V_z$  is continuous with respect to  $z$

Where  $z^u = -\delta_{\min} \geq 0$ ,  $z^l = -\delta_{\max} \leq 0$ . Differentiating  $V_z$  (S14) with respect to time, yields

$$\frac{dV_z}{dt} = \psi_z \frac{dz}{dt}$$

Substituting the expression of  $dz/dt$  (S11) and arranging, yields

$$\frac{dV_z}{dt} = (-1)\omega|b|\psi_z(z + \delta) \quad (S17)$$

From the definition of  $\psi_z$  (S15) and properties (S13a), (S13b), (S16) it follows that

$$\begin{aligned} z + \delta &\geq \psi_z > 0 \text{ for } z > -\delta_{\min} \geq 0 \\ z + \delta &\leq \psi_z < 0 \text{ for } z < -\delta_{\max} \leq 0 \\ \psi_z(z + \delta) &= 0 = \psi_z^2 \text{ for } z \in [-\delta_{\max}, -\delta_{\min}] \end{aligned} \quad (S18)$$

Therefore,

$$\begin{aligned} \text{sgn}(z + \delta) &= \text{sgn}(\psi_z) \neq 0 \text{ for } z \notin [-\delta_{\max}, -\delta_{\min}] \\ |z + \delta| &\geq |\psi_z| \text{ for } z \notin [-\delta_{\max}, -\delta_{\min}] \end{aligned}$$

From these properties it follows that

$$(z + \delta)\psi_z = |z + \delta| |\psi_z| \geq \psi_z^2 \text{ for } z \notin [-\delta_{\max}, -\delta_{\min}] \quad (S19)$$

Combining properties (S18), (S19), yields  $(z + \delta)\psi_z \geq \psi_z^2$ . Hence  $-\psi_z(z + \delta) \leq -\psi_z^2$ . Using this property in Eq (S17), yields

$$\frac{dV_z}{dt} \leq (-1)\omega|b|\psi_z^2 \leq 0$$

Using the definition of  $V_z$  (S14), we have

$$\frac{dV_z}{dt} \leq -2\omega|b|V_z \leq 0 \quad (S20)$$

Hence,  $V_z \leq V_{z|t_0} e^{-2\omega \int_{t_0}^t |b| dt}$ . Using the property (3), yields  $V_z \leq V_{z|t_0} e^{-2\omega b_{\min}(t-t_0)}$ .

Using the definition of  $V_z$  (S14) and applying square root, yields

$$|\psi_z| \leq |\psi_{z|t_0}| e^{-\omega b_{\min}(t-t_0)} \quad (S21)$$

Therefore,  $V_z \in \mathcal{L}_\infty$  and  $V_z$  converges to zero. From this result and the definition of  $V_z$  (S14), it follows that  $\psi_z \in \mathcal{L}_\infty$  and  $\psi_z$  converges to zero. This and the definition of  $\psi_z$  (S15) imply that  $z \in \mathcal{L}_\infty$  and  $z$  converges to  $\Omega_z = [z^l, z^u]$ ,  $z^l = -\delta_{\max} \leq 0$ ,  $z^u = -\delta_{\min} \geq 0$ . This completes the proof of Tii.

From the definition of  $\psi_z$  (S15) it follows that  $|z| \leq |\psi_z| + \max\{-\delta_{\min}, \delta_{\max}\}$ . Substituting the equation for the convergence of  $\psi_z$  (S21), yields

$$|z| \leq |\psi_{z|t_0}| e^{-\omega b_{\min}(t-t_0)} + \max\{-\delta_{\min}, \delta_{\max}\} \quad (S22)$$

This completes the proof.  $\square$

**Remark 7.** The convergence region of  $z$ , that is  $\Omega_z$ , depends on the bounds of  $\delta$  (19), hence on the bounds of  $\delta_2/(b\omega)$  and  $\delta_1/b$ . Consequently, its width can be reduced to some extent by choosing a high  $\omega$  value, but it cannot be made arbitrarily small.

**Remark 8.** The convergence rate of  $z$  is given by the  $dz/dt$  expression (21) and the definition of  $\delta$  (19): i) large values of  $\omega$  increase the convergence rate of  $z$ ; ii) large values of  $\omega$  decrease the effect of disturbance  $\delta_2$ , but not the effect of disturbance term  $\delta_1$ .

**Theorem 2. [Convergence of  $\bar{x}_1$  and boundedness of the updated parameter].** Consider the model (1), (2) subject to assumptions 1 to 3 and the observer (5)–(7), with definitions (8)–(10). As a result of this observer: Ti) the updated parameter  $\hat{\theta}_\delta$  remains bounded; Tii) the observer error  $\bar{x}_1 = \hat{x}_1 - x_1$  asymptotically converges to  $\Omega_{x1} = [-\varepsilon, \varepsilon]$ ; Tiii) the bound of the transient response of  $\bar{x}_1$  is:  $|\bar{x}_1| \leq \varepsilon + \sqrt{\psi_{x1|to}^2 + \psi_{z|to}^2 + \gamma^{-1}\tilde{\theta}_{to}^2}$ , where  $\psi_{x1|to}$ ,  $\psi_{z|to}$ ,  $\tilde{\theta}_{to}$  are the initial values of  $\psi_{x1}$ ,  $\psi_z$ ,  $\tilde{\theta}_\delta$ , respectively,  $\psi_{x1}$  is given by

$$\psi_{x1} = \begin{cases} \bar{x}_1 - \varepsilon & \text{for } \bar{x}_1 \geq \varepsilon \\ 0 & \text{for } \bar{x}_1 \in [-\varepsilon, \varepsilon] \\ \bar{x}_1 + \varepsilon & \text{for } \bar{x}_1 \leq -\varepsilon \end{cases},$$

$\tilde{\theta}_\delta$  is  $\tilde{\theta}_\delta = \hat{\theta}_\delta - \theta_\delta$ , and  $\theta_\delta$  is the upper bound of  $(-\delta_{zt} - \delta_1/b)$ .

**Proof.** Using the defined function  $g_1$  (S10), the  $x_1$  observer (S11) takes the form

$$\frac{d\bar{x}_1}{dt} = b\hat{x}_2 - b\left(\sigma\omega\bar{x}_1 + \frac{1}{\sigma\omega}g_2\right) + h_1$$

and the dynamics of  $\bar{x}_1$  (S13) takes the form

$$\frac{d\bar{x}_1}{dt} = b\bar{x}_2 - b\left(\sigma\omega\bar{x}_1 + \frac{1}{\sigma\omega}g_2\right) - \delta_1 \quad (\text{S23})$$

It remains to define the function  $g_2$ . The  $\bar{x}_1$  dynamics (S23) can be rewritten as

$$\frac{d\bar{x}_1}{dt} = b\left(z - \frac{1}{\sigma\omega}g_2 - \frac{\delta_1}{b}\right) \quad (\text{S24})$$

Where  $z$  is defined in Eq (S18). The subsystem Lyapunov function for  $\bar{x}_1$  and  $z$  is selected:

$$V_{zx1} = V_{x1} + V_z \quad (\text{S25})$$

where

$$V_{x1} = \frac{1}{2}\psi_{x1}^2 \quad (\text{S26})$$

$$\psi_{x1} = \begin{cases} \bar{x}_1 - \varepsilon & \text{for } \bar{x}_1 \geq \varepsilon \\ 0 & \text{for } \bar{x}_1 \in [-\varepsilon, \varepsilon] \\ \bar{x}_1 + \varepsilon & \text{for } \bar{x}_1 \leq -\varepsilon \end{cases} \quad (\text{S27})$$

and  $V_z$  is defined in Eq (S14). The main properties of  $V_{x1}$  are:

$$V_{x1} = 0 \text{ for } \bar{x}_1 \in [-\varepsilon, \varepsilon]$$

$$V_{x1} > 0 \text{ for } \bar{x}_1 \notin [-\varepsilon, \varepsilon]$$

$$V_{x1} \text{ is continuous with respect to } \bar{x}_1$$

Differentiating  $V_{zx1}$  (S25) and  $V_{x1}$  (S26) with respect to time, yields

$$\frac{dV_{zx1}}{dt} = \frac{dV_z}{dt} + \frac{dV_{x1}}{dt}, \quad \frac{dV_{x1}}{dt} = \psi_{x1} \frac{d\bar{x}_1}{dt}$$

Combining these expressions with the expressions for  $dV_z/dt$  (S20) and  $d\bar{x}_1/dt$  (S24), yields:

$$\frac{dV_{zx1}}{dt} \leq -2\omega|b|V_z + \psi_{x1}b\left(z - \frac{1}{\sigma\omega}g_2 - \frac{\delta_1}{b}\right) \quad (\text{S28})$$

Let

$$\delta_{zt} = \psi_z - z \quad (\text{S29})$$

Using the definition of  $\psi_z$  (S15), yields

$$\delta_{zt} = \begin{cases} \delta_{min} & \text{for } z \geq -\delta_{min} \geq 0 \\ -z & \text{for } z \in (-\delta_{max}, -\delta_{min}) \\ \delta_{max} & \text{for } z \leq -\delta_{max} \leq 0 \end{cases}$$

Hence,  $\delta_{zt} \in [\delta_{min}, \delta_{max}]$ , and

$$\begin{aligned} |\delta_{zt}| &\leq \theta_{\delta zt} \\ \theta_{\delta zt} &= \max\{-\delta_{min}, \delta_{max}\} \end{aligned} \quad (\text{S30})$$

From the definition of  $\delta_{zt}$  (S29), it follows that  $z = \psi_z - \delta_{zt}$ . Substituting into Eq (S28) and arranging, yields:

$$\frac{dV_{zx1}}{dt} \leq -\omega|b| \left( \psi_z^2 - \frac{1}{\sigma\omega} \psi_{x1} \psi_z \right) + b\psi_{x1} \left( -\frac{1}{\sigma\omega} g_2 - \delta_{zt} - \frac{\delta_1}{b} \right) \quad (S31)$$

The term  $\psi_z^2 - (1/(\sigma\omega))\psi_{x1}\psi_z$  can be rewritten as

$$\psi_z^2 - \frac{1}{\sigma\omega} \psi_{x1} \psi_z = \left( \psi_z - \frac{1}{2\sigma\omega} \psi_{x1} \right)^2 - \frac{1}{4\omega^2} \psi_{x1}^2$$

Substituting into Eq. (S31) and arranging, yields

$$\begin{aligned} \frac{dV_{zx1}}{dt} \leq & |b| \left( -k\psi_{x1}^2 - \omega \left( \psi_z - \frac{1}{2\sigma\omega} \psi_{x1} \right)^2 + \frac{1}{4\omega} \psi_{x1}^2 \right) \\ & + |b| \frac{1}{\sigma} \psi_{x1} \left( k\sigma\psi_{x1} - \frac{1}{\sigma\omega} g_2 \right) + b\psi_{x1} \left( -\delta_{zt} - \frac{\delta_1}{b} \right) \end{aligned} \quad (S32)$$

where  $-\delta_{zt}, \delta_1, 1/b$  are bounded as indicated by Eqs (S30), (S4), (S2), so that  $(-\delta_{zt} - \delta_1/b)$  is bounded and:

$$b\psi_{x1} \left( -\delta_{zt} - \frac{\delta_1}{b} \right) \leq |b| |\psi_{x1}| \left| -\delta_{zt} - \frac{\delta_1}{b} \right| \leq \theta_\delta |\psi_{x1}| |b| \quad (S33)$$

where  $\theta_\delta$  is the upper bound of  $(-\delta_{zt} - \delta_1/b)$ , and it is unknown, positive, and constant:  $|\delta_{zt} - \delta_1/b| \leq \theta_\delta$ . Let

$$\tilde{\theta}_\delta = \hat{\theta}_\delta - \theta_\delta \quad (S34)$$

Hence  $\theta_\delta = \hat{\theta}_\delta - \tilde{\theta}_\delta$ . Substituting into Eq (S33), yields

$$\begin{aligned} b\psi_{x1} \left( -\delta_{zt} - \frac{\delta_1}{b} \right) & \leq |b| (\hat{\theta}_\delta - \tilde{\theta}_\delta) |\psi_{x1}| = |b| |\psi_{x1}| \hat{\theta}_\delta - |\psi_{x1}| \tilde{\theta}_\delta |b| \\ & = |b| \frac{1}{\sigma} \psi_{x1} \sigma \text{sgn}(\psi_{x1}) \hat{\theta}_\delta - |\psi_{x1}| \tilde{\theta}_\delta |b| \end{aligned}$$

Substituting into Eq (S32) and arranging, yields

$$\begin{aligned} \frac{dV_{zx1}}{dt} \leq & |b| \left( -k\psi_{x1}^2 - \omega \left( \psi_z - \frac{1}{2\sigma\omega} \psi_{x1} \right)^2 + \frac{1}{4\omega} \psi_{x1}^2 \right) \\ & + |b| \left( \frac{1}{\sigma} \psi_{x1} \left( k\sigma\psi_{x1} - \frac{1}{\sigma\omega} g_2 + \sigma \text{sgn}(\psi_{x1}) \hat{\theta}_\delta \right) - |\psi_{x1}| \tilde{\theta}_\delta \right) \end{aligned}$$

Arranging, yields

$$\begin{aligned} \frac{dV_{zx1}}{dt} \leq & |b| \left( -k\psi_{x1}^2 - \omega \left( \psi_z - \frac{1}{2\sigma\omega} \psi_{x1} \right)^2 \right) \\ & + |b| \left( \psi_{x1} \left( \frac{1}{4\omega} \psi_{x1} + k\psi_{x1} - \frac{1}{\omega} g_2 \right) + |\psi_{x1}| \hat{\theta}_\delta - |\psi_{x1}| \tilde{\theta}_\delta \right) \end{aligned} \quad (S35)$$

Which is equivalent to

$$\begin{aligned} \frac{dV_{zx1}}{dt} \leq & |b| \left( -k\psi_{x1}^2 - \omega \left( \psi_z - \frac{1}{2\sigma\omega} \psi_{x1} \right)^2 \right) \\ & + |b| \left( \psi_{x1} \left( \frac{1}{4\omega} \psi_{x1} + k\psi_{x1} - \frac{1}{\omega} g_2 + \text{sgn}(\psi_{x1}) \hat{\theta}_\delta \right) - |\psi_{x1}| \tilde{\theta}_\delta \right) \end{aligned} \quad (S36)$$

This equation would lead to a  $g_2$  definition involving the discontinuous signal  $\text{sgn}(\psi_{x1})$ . To remedy this, we will use a saturation signal instead, but guaranteeing that the negativeness of  $dV_{zx1}/dt$  is not affected. From definition (S27), it follows that  $|\psi_{x1}|$  satisfies:

$$|\psi_{x1}| = \text{sat}_{x1} \psi_{x1} \quad (S37)$$

where

$$\text{sat}_{x1} = \begin{cases} 1 & \text{for } \bar{x}_1 \geq \varepsilon \\ \frac{1}{\varepsilon} \bar{x}_1 & \text{for } \bar{x}_1 \in [-\varepsilon, \varepsilon] \\ -1 & \text{for } \bar{x}_1 \leq -\varepsilon \end{cases}$$

Substituting (S37) into Eq (S35), yields

$$\begin{aligned} \frac{dV_{zx1}}{dt} \leq & |b| \left( -k\psi_{x1}^2 - \omega \left( \psi_z - \frac{1}{2\sigma\omega} \psi_{x1} \right)^2 \right) \\ & + |b| \left( \psi_{x1} \left( \frac{1}{4\omega} \psi_{x1} + k\psi_{x1} + \text{sat}_{x1} \hat{\theta}_\delta - \frac{1}{\omega} g_2 \right) - |\psi_{x1}| \tilde{\theta}_\delta \right) \end{aligned} \quad (S38)$$

To counteract the effect of the term  $\psi_{x1} \left( \frac{1}{4\omega} \psi_{x1} + k\psi_{x1} + \text{sat}_{x1} \hat{\theta}_\delta \right)$ , we choose

$$g_2 = \omega \left( \left( k + \frac{1}{4\omega} \right) \psi_{x1} + \text{sat}_{x1} \hat{\theta}_\delta \right)$$

Substituting into Eq (S38), yields

$$\frac{dV_{zx1}}{dt} \leq |b| \left( -k\psi_{x1}^2 - \omega \left( \psi_z - \frac{1}{2\sigma\omega} \psi_{x1} \right)^2 - |\psi_{x1}| \tilde{\theta}_\delta \right) \quad (\text{S39})$$

We choose the subsystem Lyapunov function for  $\bar{x}_1, z, \tilde{\theta}_\delta$  to be:

$$V_{z\theta x1} = V_{zx1} + V_\theta, \quad (\text{S40})$$

$$V_\theta = \frac{1}{2} \gamma^{-1} \tilde{\theta}_\delta^2 \quad (\text{S41})$$

where  $V_{zx1}$  is defined in Eq (S25) and  $\tilde{\theta}_\delta$  in Eq (S34). Differentiating (S40) with respect to time, yields

$$\frac{dV_{z\theta x1}}{dt} = \frac{dV_{zx1}}{dt} + \frac{dV_\theta}{dt} \quad (\text{S42})$$

Differentiating  $V_\theta$  (S41) with respect to time, using the definition of  $\tilde{\theta}_\delta$  (S34), we get

$$\frac{dV_\theta}{dt} = \gamma^{-1} \tilde{\theta}_\delta \frac{d\tilde{\theta}_\delta}{dt} \quad (\text{S43})$$

Substituting the expression for  $dV_{zx1}/dt$  (S39) and  $dV_\theta/dt$  (S43) into Eq (S42) and arranging, yields

$$\begin{aligned} \frac{dV_{z\theta x1}}{dt} \leq & |b| \left( -k\psi_{x1}^2 - \omega \left( \psi_z - \frac{1}{2\sigma\omega} \psi_{x1} \right)^2 \right) \\ & + \tilde{\theta}_\delta \left( -|b||\psi_{x1}| + \gamma^{-1} \frac{d\tilde{\theta}_\delta}{dt} \right) \end{aligned} \quad (\text{S44})$$

To eliminate the effect of the term  $\tilde{\theta}_\delta(-|b||\psi_{x1}|)$ , we choose the update law

$$\frac{d\tilde{\theta}_\delta}{dt} = \gamma |b| |\psi_{x1}|$$

Substituting into Eq (S44), yields

$$\frac{dV_{z\theta x1}}{dt} \leq |b| \left( -k\psi_{x1}^2 - \omega \left( \psi_z - \frac{1}{2\sigma\omega} \psi_{x1} \right)^2 \right) \quad (\text{S45})$$

In summary, the observer equations are:

$$\frac{d\hat{x}_1}{dt} = b\hat{x}_2 - |b| \left( \omega \bar{x}_1 + \left( k + \frac{1}{4\omega} \right) \psi_{x1} + \text{sat}_{x1} \hat{\theta}_\delta \right) + h_1$$

$$\frac{d\hat{x}_2}{dt} = -b\omega \left( \left( k + \frac{1}{4\omega} \right) \psi_{x1} + \text{sat}_{x1} \hat{\theta}_\delta \right) + h_2$$

$$\frac{d\hat{\theta}_\delta}{dt} = \gamma |b| |\psi_{x1}|$$

$$g_2 = \omega \left( \left( k + \frac{1}{4\omega} \right) \psi_{x1} + \text{sat}_{x1} \hat{\theta}_\delta \right)$$

$$\text{sat}_{x1} = \begin{cases} 1 & \text{for } \bar{x}_1 \geq \varepsilon \\ \frac{1}{\varepsilon} \bar{x}_1 & \text{for } \bar{x}_1 \in [-\varepsilon, \varepsilon] \\ -1 & \text{for } \bar{x}_1 \leq -\varepsilon \end{cases}$$

$$\psi_{x1} = \begin{cases} \bar{x}_1 - \varepsilon & \text{for } \bar{x}_1 \geq \varepsilon \\ 0 & \text{for } \bar{x}_1 \in [-\varepsilon, \varepsilon] \\ \bar{x}_1 + \varepsilon & \text{for } \bar{x}_1 \leq -\varepsilon \end{cases}$$

We prove that  $\bar{x}_1$  converges to  $\Omega_{x1} = [-\varepsilon, \varepsilon]$  at what follows. From Eq (S45) it follows that  $\dot{V}_{z\theta x1} \leq -k|b|\psi_{x1}^2 \leq 0$ . Since coefficient  $b$  satisfies property (3), we have

$$\frac{dV_{z\theta x1}}{dt} \leq -kb_{\min} \psi_{x1}^2 \leq 0 \quad (\text{S46})$$

Arranging and integrating, yields  $V_{z\theta x1} + kb_{\min} \int_{t_0}^t \psi_{x1}^2 dt \leq V_{z\theta x1|t_0}$  where  $V_{z\theta x1|t_0}$  is the initial value of  $V_{z\theta x1}$ . Hence,

$$V_{z\theta x1} \leq V_{z\theta x1|t_0} \quad (\text{S47})$$

and  $kb_{\min} \int_{t_0}^t \psi_{x1}^2 dt \leq V_{z\theta x1|t_0}$ , so that  $V_{z\theta x1} \in \mathcal{L}_\infty, \psi_{x1}^2 \in \mathcal{L}_1$ . This implies:

- i)  $V_{zx1} \in \mathcal{L}_\infty, V_\theta \in \mathcal{L}_\infty, V_z \in \mathcal{L}_\infty, V_{x1} \in \mathcal{L}_\infty$ , what follows from the definitions of  $V_{z\theta x1}$  (S40) and  $V_{zx1}$  (S25)
- ii)  $\psi_z \in \mathcal{L}_\infty, z \in \mathcal{L}_\infty$ , what follows from the definitions of  $V_{z\theta x1}$  (S40),  $V_{zx1}$  (S25),  $V_z$  (S14), and  $\psi_z$  (S15)
- iii)  $\psi_{x1} \in \mathcal{L}_\infty, \bar{x}_1 \in \mathcal{L}_\infty, \psi_{x1}^2 \in \mathcal{L}_\infty$ , what follows from the definitions of  $V_{x1}$  (S26) and  $\psi_{x1}$  (S27)
- iv)  $\tilde{\theta}_\delta \in \mathcal{L}_\infty, \hat{\theta}_\delta \in \mathcal{L}_\infty$ , what follows from the definitions of  $V_\theta$  (S41) and  $\tilde{\theta}_\delta$  (S34),

This completes the proof of Ti.

To apply the Barbalat's lemma, the fulfilment of condition  $d\psi_{x1}^2/dt \in \mathcal{L}_\infty$  is required, which requires the fulfillment of  $d\bar{x}_1/dt \in \mathcal{L}_\infty$ . The latter condition is verified based on Eq. (S24) and the boundedness of the signals involved therein. Applying the Barbalat's lemma ([28]), yields

$$\lim_{t \rightarrow \infty} \psi_{x1}^2 = 0 \quad (\text{S48})$$

This result and the definition of  $\psi_{x1}$  (S27) imply that  $\bar{x}_1$  converges asymptotically to  $\Omega_{x1} = [-\varepsilon, \varepsilon]$ . This completes the proof of Tii.

From the definition of  $\psi_{x1}$  (S27) it follows that

$$|\bar{x}_1| \leq |\psi_{x1}| + \varepsilon \quad (\text{S49})$$

Using the definitions of  $V_{z\theta x1}$  (S40),  $V_{zx1}$  (S25),  $V_\theta$  (S41),  $V_{x1}$  (S26),  $V_z$  (S14) in Eq (S47), yields:

$$\begin{aligned} \frac{1}{2}\psi_{x1}^2 + \frac{1}{2}\psi_z^2 + \frac{1}{2}\gamma^{-1}\tilde{\theta}^2 &\leq \frac{1}{2}\psi_{x1|t0}^2 + \frac{1}{2}\psi_{z|t0}^2 + \frac{1}{2}\gamma^{-1}\tilde{\theta}_{t0}^2 \\ \text{where } \psi_{x1|t0}, \psi_{z|t0}, \tilde{\theta}_{t0} &\text{ are the initial values of } \psi_{x1}, \psi_z, \tilde{\theta}_b. \text{ Therefore, } |\psi_{x1}| \leq \\ &(\psi_{x1|t0}^2 + \psi_{z|t0}^2 + \gamma^{-1}\tilde{\theta}_{t0}^2)^{1/2}. \text{ Combining this result with Eq (S49), yields} \\ |\bar{x}_1| &\leq \varepsilon + \sqrt{\psi_{x1|t0}^2 + \psi_{z|t0}^2 + \gamma^{-1}\tilde{\theta}_{t0}^2} \end{aligned} \quad (\text{S50})$$

This completes the proof.  $\square$

**Theorem 3. [Convergence of  $\bar{x}_2$ : upper bound of the transient response and convergence region].** Consider the model (1), (2) subject to assumptions 1 to 3 and the observer (5)–(7), with definitions (8)–(10). As a result of this observer: Ti) the transient response of the observer error  $\bar{x}_2 = \hat{x}_2 - x_2$  satisfies:

$$\begin{aligned} |\bar{x}_2| &\leq |\psi_{z|t0}|e^{-\omega b_{min}(t-t_0)} + \max\{-\delta_{min}, \delta_{max}\} + \omega \left( \varepsilon + \sqrt{\psi_{x1|t0}^2 + \psi_{z|t0}^2 + \gamma^{-1}\tilde{\theta}_{t0}^2} \right), \\ \text{where } \delta &= \frac{1}{b} \left( \frac{\delta_2}{\sigma\omega} - \delta_1 \right); \text{ Tii) } |\bar{x}_2| \leq |\psi_{z|t0}|e^{-\omega b_{min}(t-t_0)} + \max\{-\delta_{min}, \delta_{max}\} + \omega \left( \varepsilon + \right. \\ &|\psi_{z|t0}| \left. \right) \text{ holds true for } \hat{x}_{1|t0} \in [-\varepsilon + x_{1|t0}, \varepsilon + x_{1|t0}] \text{ and a high } \gamma \text{ value leading to } \gamma^{-1}\tilde{\theta}_{t0}^2 \approx 0; \\ \text{Tiii) the observer error } \bar{x}_2 &\text{ asymptotically converges to} \\ \Omega_{x2} &= \{\bar{x}_2: |\bar{x}_2| \leq \max\{-\delta_{min}, \delta_{max}\} + \omega\varepsilon\}. \end{aligned}$$

**Proof.** From the definition of  $z$  (S18), it follows that

$$|\bar{x}_2| = |z - \sigma\omega\bar{x}_1| \leq |z| + |\omega\bar{x}_1| = |z| + \omega|\bar{x}_1| \quad (\text{S51})$$

Recall that  $z$  can be expressed as function of  $\psi_z$  and  $\bar{x}_1$  as function of  $\psi_{x1}$ . Substituting Eqs (S22), (S50) into Eq (S51), yields

$$|\bar{x}_2| \leq |\psi_{z|t0}|e^{-\omega b_{min}(t-t_0)} + \max\{-\delta_{min}, \delta_{max}\} + \omega \left( \varepsilon + \sqrt{\psi_{x1|t0}^2 + \psi_{z|t0}^2 + \gamma^{-1}\tilde{\theta}_{t0}^2} \right) \quad (\text{S52})$$

This completes the proof of Ti.

Low values of the terms  $\psi_{x1|t0}$  and  $\gamma^{-1}\tilde{\theta}_{t0}^2$  appearing in Eq (S52) can be obtained as follows:

- i)  $\psi_{x1|t0} = 0$  if  $\hat{x}_{1|t0} \in [-\varepsilon + x_{1|t0}, \varepsilon + x_{1|t0}]$ , what implies  $\bar{x}_{1|t0} \in [-\varepsilon, \varepsilon]$
- ii) a low value  $\gamma^{-1}\tilde{\theta}_{t0}^2 \approx 0$  is obtained by using a high  $\gamma$  value

Substituting these values into Eq (S52), yields

$$\begin{aligned} |\bar{x}_2| &\leq |\psi_{z|t0}|e^{-\omega b_{min}(t-t_0)} + \max\{-\delta_{min}, \delta_{max}\} + \omega(\varepsilon + |\psi_{z|t0}|) \\ \text{for } \hat{x}_{1|t0} &\in [-\varepsilon + x_{1|t0}, \varepsilon + x_{1|t0}] \text{ and a high } \gamma \text{ value leading to } \gamma^{-1}\tilde{\theta}_{t0}^2 \approx 0 \end{aligned} \quad (\text{S53})$$

This completes the proof of Tii.

Expression (S51), jointly with the convergence of  $z$  to  $\Omega_z$  (See Theorem 1) and the convergence of  $\bar{x}_1$  to  $\Omega_{x1} = [-\varepsilon, \varepsilon]$  (Theorem 2) implies that  $\bar{x}_2$  converges to

$$\Omega_{x2} = \{\bar{x}_2: |\bar{x}_2| \leq \max\{-\delta_{min}, \delta_{max}\} + \omega\varepsilon\} \quad (S54)$$

This completes the proof of Tiii.  $\square$
